# Supplementary material
Source: PubMed Central journal article supplement (PMC5971467)
Supplement: supp_RA118.001856_135223_2_supp_105525_p69lly.pdf [file supp_RA118.001856_135223_2_supp_105525_p69lly.pdf]

The plant defence signal galactinol is used as a resource of high specificity by the pathogen *Agrobacterium fabrum*

**Thibault Meyer<sup>1#</sup>, Armelle Vigouroux<sup>2#</sup>, Magali Aumont-Nicaise<sup>2</sup>, Gilles Comte<sup>1</sup>, Ludovic Vial<sup>1</sup>, Céline Lavire<sup>1\*</sup> & Solange Moréra<sup>2\*</sup>**

<sup>1</sup> UMR Ecologie Microbienne, CNRS, INRA, VetAgro Sup, UCBL, Université de Lyon, F-69622, Villeurbanne, Lyon, France; <sup>2</sup> Institute for Integrative Biology of the Cell (I2BC), CNRS CEA Univ. Paris-Sud, Université Paris-Saclay, Avenue de la Terrasse, 91198 Gif-sur-Yvette, France

Running title: Galactinol and melibiose bound to MelB

Supporting Information: Figs. S1-S2 and Tables S1-S2

**Fig. S1.** ITC and fluorescence  $K_D$  measurements of MelB towards RFOs and their derivatives. The top graphs show fluorescence monitoring of MelB upon titration with each ligand and fit (solid line) to a single binding model using Origin 7. Measures were done in triplicate. The lower graphs correspond to microcalorimetry experiments. The top panel shows heat differences upon injection of ligand and low panel shows integrated heats of injection with the best fit (solid line) to a single binding model using Microcal ORIGIN.

**Fig. S2.** DSC thermograms of MelB

**Figure S1**

**MeIB-galactinol**

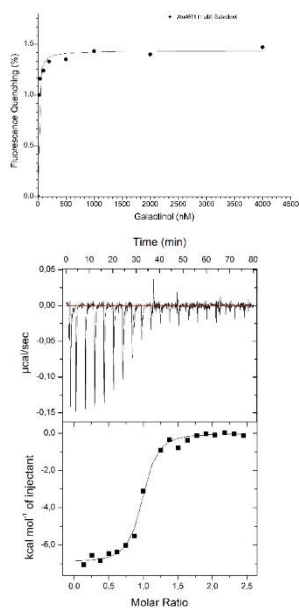

**MeIB-melibiose**

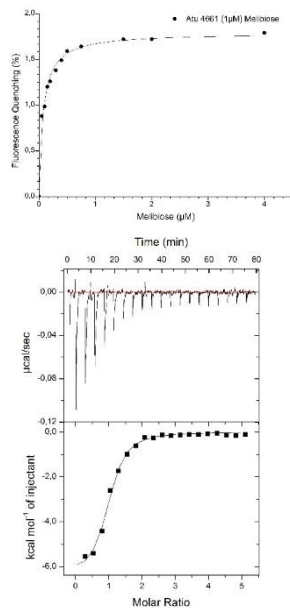

**MeIB-raffinose**

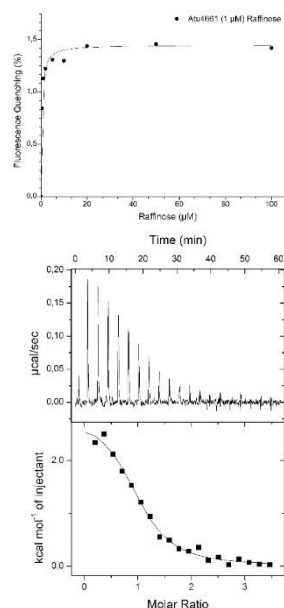

**MeIB-stachyose**

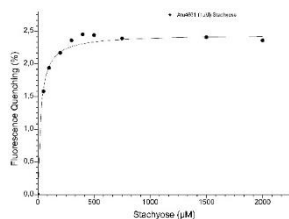

**MeIB-galactose**

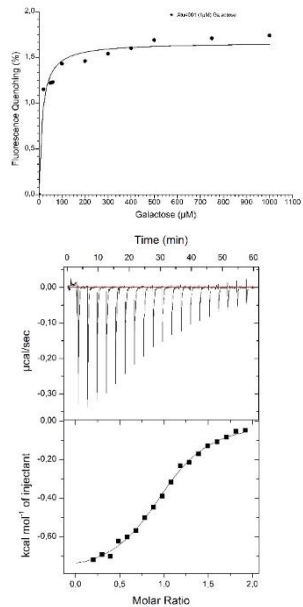

Not  
determined  
by ITC

Figure S2

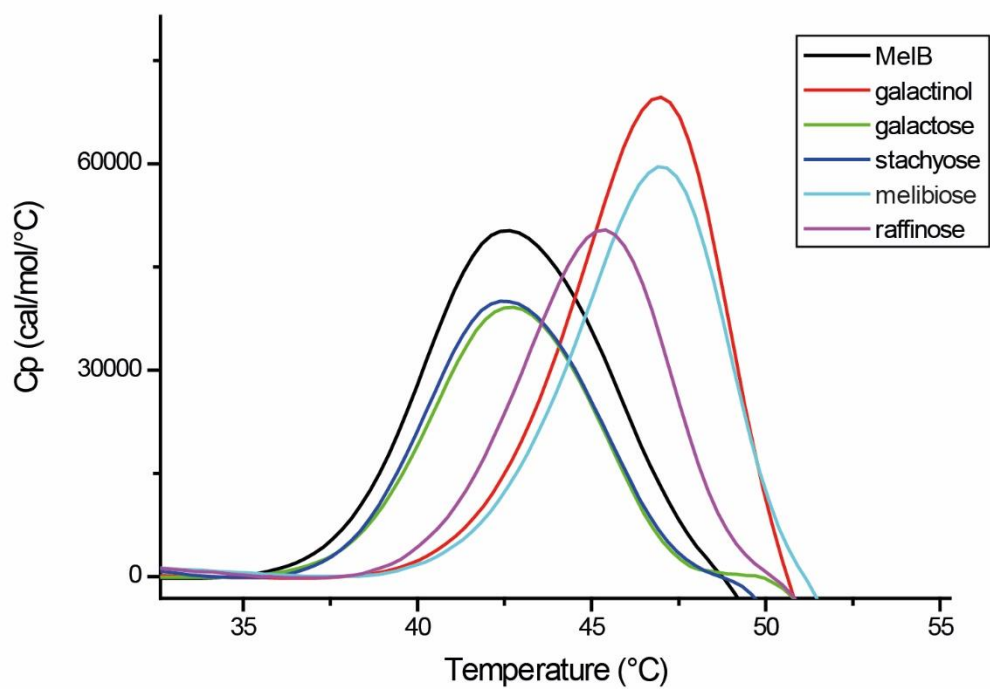

|                     | <b>T<sub>m</sub> (°C)</b> | <b>ΔH (Kcal/mol/°C)</b> |
|---------------------|---------------------------|-------------------------|
| <b>MelB</b>         | 43.5                      | 323                     |
| <b>+ galactinol</b> | 46.5                      | 362                     |
| <b>+ galactose</b>  | 43.3                      | 225                     |
| <b>+ stachyose</b>  | 43.2                      | 236                     |
| <b>+ melibiose</b>  | 46.6                      | 314                     |
| <b>+ raffinose</b>  | 45.1                      | 265                     |

**Table S1. Strains and plasmids used in this study**

| Strains                             | Relevant genotype and description                                                                                                                   | Reference or source |
|-------------------------------------|-----------------------------------------------------------------------------------------------------------------------------------------------------|---------------------|
| <b><i>Escherichia coli</i></b>      |                                                                                                                                                     |                     |
| JM109                               | <i>endA1 glnV44 thi-1 relA1 gyrA96 recA1 mcrB+ Δ(lac-proAB) e14- [F' traD36 proAB+ lacIq lacZΔM15] hsdR17(rK-mK+)</i>                               | NEB catalog         |
| BL21                                | $F^- ompT gal dcm lon hsdS_B(r_B^- m_B^-) [malB^+]_{K-12}(\lambda^S)$                                                                               | NEB catalog         |
| Stellar                             | <i>F<sup>-</sup>, endA1, supE44, thi-1, recA1, relA1, gyrA96, phoA, Φ80d lacZΔ M15, Δ(lacZYA - argF) U169, Δ(mrr - hsdRMS - mcrBC), ΔmcrA, λ-</i>   | Takara Clontech     |
| <b><i>Agrobacterium fabrum</i></b>  |                                                                                                                                                     |                     |
| C58                                 | Wild-type                                                                                                                                           | CFBP 1903           |
| C58Δ <i>melB</i> ( <i>atu4661</i> ) | C58 deleted of <i>melB</i> ( <i>atu4661</i> ) gene                                                                                                  | This study          |
| C58 p <i>Tiatu6148</i> :Km          | C58 disrupted for <i>atu6148</i> gene ; Km <sup>R</sup>                                                                                             | (1)                 |
| <b>Plasmids</b>                     |                                                                                                                                                     |                     |
| pJQ200SK                            | Suicide vector; P15A sacB; Gm <sup>R</sup>                                                                                                          | (2)                 |
| pOT1e                               | Promoter-probe vector based on pBBR1MCS-5 replicon; contains promoterless eGFP and MCS between two transcriptional terminators; Gm <sup>R</sup> (3) | (3)                 |
| pOT1eM                              | pOT1e derivative harboring <i>Ptac-m-cherry</i> inserted in ClaI-SalI site (4)                                                                      | (4)                 |
| pET-9(a)                            | <i>E. coli</i> expression vector (N-term T7-tag fusion), Km <sup>R</sup>                                                                            | Novagen             |
| <b>pOT1e-P<i>mel</i></b>            | <b>Upstream region <i>atu4660-atu4665</i> inserted in ClaI-SalI site in pOT1e; Gm<sup>R</sup> This study</b>                                        |                     |
| pOT1eM-P <i>mel</i>                 | Upstream region <i>atu4660-atu4665</i> inserted in SpeI site in pOT1eM; Gm <sup>R</sup> This study                                                  | This study          |
| pET-9(a)- <i>melB</i>               | <i>melB</i> inserted in NdeI-BamHI site in pET-29(a) (N-term T7-tag fusion), Km <sup>R</sup> This study                                             | This study          |

- Lang, J., Planamente, S., Mondy, S., Dessaux, Y., Moréra, S., and Faure, D. (2013) Concerted transfer of the virulence Ti plasmid and companion At plasmid in the *Agrobacterium tumefaciens*-induced plant tumour. *Mol. Microbiol.* **90**, 1178–1189
- Quandt, J., and Hynes, M. F. (1993) Versatile suicide vectors which allow direct selection for gene replacement in gram-negative bacteria. *Gene.* **127**, 15–21
- Allaway, D., Schofield, N. A., Leonard, M. E., Gilardoni, L., Finan, T. M., and Poole, P. S. (2001) Use of differential fluorescence induction and optical trapping to isolate environmentally induced genes. *Environ. Microbiol.* **3**, 397–406
- Meyer, T., Renoud, S., Vigouroux, A., Miomandre, A., Gaillard, V., Kerzaon, I., Prigent-Combaret, C., Comte, G., Moréra, S., Vial, L., and Lavire, C. (2018) Regulation of hydroxycinnamic acid degradation drives *Agrobacterium fabrum* lifestyles. *Mol. Plant-Microbe Interact. MPMI.* 10.1094/MPMI-10-17-0236-R

**Table S2. Primers used in this study**

| Primer                                       |                 |                                     |            |
|----------------------------------------------|-----------------|-------------------------------------|------------|
| Target                                       | Primer name     | Primer sequence (5'-3')             | Reference  |
| <i>Transcriptional fusion</i>                |                 |                                     |            |
| <i>mel</i> promoter<br>insertion into pOT1e  | <i>Pmel</i> F   | ATCGATACCACATAATGGCGGTTCTC          | This study |
|                                              | <i>Pmel</i> R   | CGAGATTGTGCTGGCTGATA                |            |
| <i>mel</i> promoter<br>insertion into pOT1eM | <i>Pmel</i> F'  | CGGGGGATCCACTAGACCACATAATGGCGGTTCTC | This study |
|                                              | <i>Pmel</i> R'  | TTCTTCCTCCACTAGCGAGATTGTGCTGGCTGATA |            |
| <i>Deletion of melB</i>                      |                 |                                     |            |
| <i>melB</i> flanking upstream region         | <i>Upmel</i> BF | GAATTCCTGCAGCCCCAACCACCAGACATGGTTC  | This study |
|                                              | <i>Upmel</i> BR | GGATATGCTTCAGTTTTGCATCGTCATTCCTCCC  |            |
| <i>melB</i> flanking downstream region       | <i>Dwmel</i> BF | AACTGAAGCATATCCGGGA                 | This study |
|                                              | <i>Dwmel</i> BR | ACTAGTGGATCCCCCTCTCGCCACTCAGCATGT   |            |
